# Supplementary material
Source: MDPI journal article supplement (https://www.mdpi.com/2071-1050/13/14/7631)
Supplement: s1 [file s1]

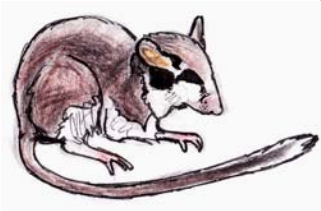

Liebe Schülerin, lieber Schüler,  
vielen Dank, dass du bei unserer Untersuchung mitmachst.  
Viel Spaß beim Ausfüllen!

## A Codename

Damit du nicht deinen echten Namen angeben musst, darfst du hier einen „Codename“ eintragen.

### Die Erstellung deines Codes

Letzter Buchstabe  
deines Vornamens  
*Beispiel: Tim*

erster Buchstabe des Vor-  
namens deiner Mutter  
*Beispiel: Petra*

dritter Buchstabe  
des Monats, in dem  
du Geburtstag hast  
*Beispiel: März*

Dein Geburtstag -  
ohne Monat und Jahr  
*Beispiel: 13.03.1996*

**M** **P** **R** **13**

Letzter Buchstabe  
deines Vornamens

erster Buchstabe des Vor-  
namens deiner Mutter

dritter Buchstabe  
des Monats, in dem  
du Geburtstag hast

Dein Geburtstag -  
ohne Monat und Jahr

Dein Code:

## B Info

Dieser Fragebogen enthält Aufgaben zum Thema Wald und zu Systemen. Wir möchten gerne wissen, was du zu diesem Thema weißt. Einige Fragen sind schwerer und andere sind leichter. Keiner wird alle Aufgaben richtig lösen können. Es ist also nicht schlimm, wenn du dir bei einigen Fragen nicht sicher bist.

Bitte markiere die richtigen Antworten immer mit **R** und die falschen mit **F**.

*Beispiel:*

**Im Schwarzwald leben verschiedene Tiere. Einige Tiere werden von anderen Tieren gefressen.**

**Frage**

**Welche Aussage ist richtig?**

**Antwort**

**A** ☐ **F** Im Schwarzwald werden Wildschweine von Rehen gefressen.

**B** ☐ **F** Im Schwarzwald werden Ameisen von Eichhörnchen gefressen.

**C** ☒ **R** Im Schwarzwald werden Schnecken von Igeln gefressen.

## Aufgabe 1

Ein Beispiel für ein Ökosystem ist ein See. Er ist Lebensraum für viele Tiere und Pflanzen. Die Tiere und Pflanzen im See stehen miteinander in Verbindung. Sie stehen miteinander in Beziehung, weil sie sich unter anderem voneinander ernähren. Das nennt man ein „Ökosystem“.

**Frage** Wobei handelt es sich auch um ein Ökosystem? Markiere richtige Antworten mit **R** und falsche mit **F**.

- Antwort**
- A** ☐ eine Wiese am Waldrand
  - B** ☐ ein Zoo, der die anfallenden Abfälle umweltfreundlich entsorgt
  - C** ☐ ein Marktstand mit Produkten aus ökologischem Anbau
  - D** ☐ ein Teich im Garten

## Aufgabe 2

**Frage** Mit welchem Schlagwort könnte man das Prinzip eines verzinsten Bankkontos beschreiben? Markiere richtige Antworten mit **R** und falsche mit **F**.

- Antwort**
- A** ☐ Regelung
  - B** ☐ Ausgleichende (negative) Rückkopplung
  - C** ☐ Verstärkende (positive) Rückkopplung
  - D** ☐ Emergenz

## Aufgabe 3

**Frage** Nachfolgend finden sich fünf Aussagen zu einer negativen Rückkopplung? Markiere richtige Antworten mit **R** und falsche mit **F**.

- Antwort**
- A** ☐ Eine negative Rückkopplung benötigt eine Überwachung von außerhalb des Systems.
  - B** ☐ Eine negative Rückkopplung hat eine dämpfende Wirkung auf ein System.
  - C** ☐ Eine negative Rückkopplung hat eine destabilisierende Wirkung auf ein System.
  - D** ☐ Eine negative Rückkopplung hat eine verstärkende Wirkung auf ein System.

## Aufgabe 4

**Frage** Nachfolgend werden bestimmte Eigenschaften von Systemen beschrieben. Markiere richtige Antworten mit **R** und falsche mit **F**.

- Antwort**
- A** ☐ Die Fähigkeit eines Systems, sich zu strukturieren, neue Strukturen zu schaffen, zu lernen oder sich zu diversifizieren, wird als Selbstorganisation bezeichnet.
  - B** ☐ Wenn sich ein System ab einem gewissen Punkt sehr schnell verändert, wird dieser Vorfall als „Emergenz“ bezeichnet.
  - C** ☐ Systemelemente stehen untereinander in Beziehung und sie wirken aufeinander.
  - D** ☐ Emergenz bedeutet vereinfacht, dass die einzelnen Elemente eines Systems zusammen mehr bewirken als ein einzelnes Element für sich alleine.

## Aufgabe 5

**Frage** Komplexe Systeme zeichnen sich oft durch Systemhierarchien aus. Markiere richtige Antworten mit **R** und falsche mit **F**.

- Antwort**
- A** ☐ Die einzelnen Organe des Systems Körper können als mit einander verbundene Teilsysteme auf der gleichen Hierarchiestufe aufgefasst werden.
  - B** ☐ Teilsysteme lassen sich in übergeordneten und untergeordneten Systemen anordnen.
  - C** ☐ Systemhierarchien ordnen Systeme danach wie effektiv sie sind.
  - D** ☐ Die Einteilung des Menschen in Zellsysteme, die in Organsystemen und die wiederum im Körpersystem enthalten sind, stellt eine hierarchische Ordnung in Systeme und Teilsysteme dar.

## Aufgabe 6

Hier siehst du eine Zeichnung mit verschiedenen Tieren aus dem Wald.  
Einige von ihnen werden von anderen Tieren gefressen.  
Der Pfeil zeigt, welches Tier von einem anderen gefressen wird.

**Beispiel:** Wenn Frösche von Schlangen gefressen werden, kann man das zum Beispiel so darstellen:

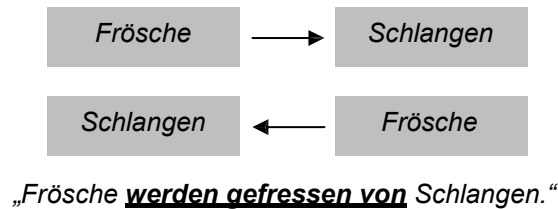

Betrachte die Zeichnung:

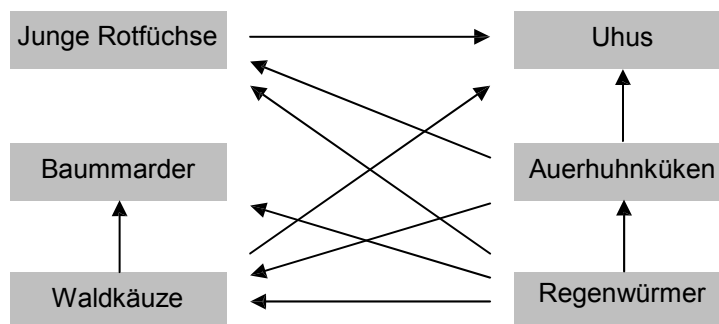

**Frage** Welche Aussage stimmt mit der Zeichnung überein? Markiere richtige Antworten mit **R** und falsche mit **F**.

- Antwort**
- A ☐ Auerhuhnküken werden gefressen von Waldkäuzen.
  - B ☐ Uhus werden gefressen von jungen Rotfüchsen.
  - C ☐ Regenwürmer werden gefressen von Uhus.
  - D ☐ Auerhuhnküken werden gefressen von Baummardern.

## Aufgabe 7

**Frage** Wie denkst du, könnte man allgemein ein System beschreiben? Markiere richtige Antworten mit **R** und falsche mit **F**.

**Antwort**

- A ☐ Ein System ist eine Menge von verschiedenen Teilen, die nach Größe, Alter und Funktionalität geordnet werden können und die klar abgrenzbar von anderen Einheiten ist.
- B ☐ Ein System ist eine Anordnung von verschiedenen Teilen, die sich ähnlich sind und ein großes Ganzes bilden.
- C ☐ Systeme lassen sich voneinander abgrenzen und sie verfügen über Systemgrenzen.
- D ☐ Ein System besteht aus verschiedenen Elementen, die völlig unabhängig voneinander sind.

## Aufgabe 8

In einem Wald werden die Blätter der Bäume von Regenwürmern gefressen. Am Waldboden leben Spitzmäuse, Regenwürmer und Käfer. Beide, Regenwürmer und Käfer werden von Spitzmäusen und von Vögeln wie Sperbern und Habichten gefressen.

**Frage** Welche der Zeichnungen stimmt mit der Information des Textes überein? Wie denkst du, könnte man allgemein ein System beschreiben? Markiere richtige Antworten mit **R** und falsche mit **F**?

**Beispiel:** Den Pfeil liest man so:

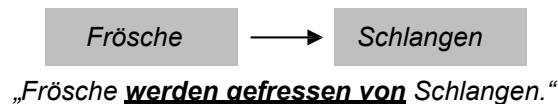

**Antwort**

- A ☐ Käfer → Spitzmäuse → Habicht
- B ☐ Blätter → Regenwürmer → Käfer
- C ☐ Blätter → Regenwürmer → Habicht
- D ☐ Regenwürmer → Sperber → Habicht

## Aufgabe 9

Ein Wald und ein Fluss liegen neben einem Feld, auf dem Mais angebaut wird. Insekten auf dem Feld schädigen den angebauten Mais. Ein Bauer sprüht Insektengift, um die Insekten zu vernichten und den Mais zu schützen.

**Frage** Was geschieht als Folge des Einsatzes von Gift? Markiere richtige Antworten mit **R** und falsche mit **F**.

- Antwort**
- A ☐ Das Gift senkt nur die Anzahl der Insekten im Feld.
  - B ☐ Das Gift beeinflusst sowohl die Tiere des Flusses als auch des Wald.
  - C ☐ Das Gift wirkt sich durch die geringere Anzahl an Insekten auch auf die Flussfische aus.
  - D ☐ Das Gift kann sowohl die Anzahl der Insekten im Feld, als auch über dem Feld und im Wald senken. Es kann sich somit auch auf die Anzahl anderer Tiere im Wald auswirken.

## Aufgabe 10

In einem Wald gibt es folgende Beziehungen zwischen Tieren:

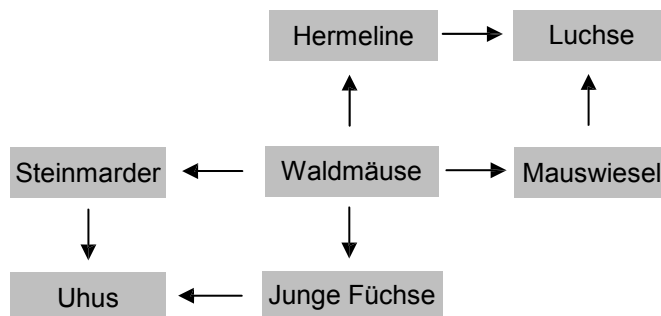

**Beispiel:** Wenn Frösche von Schlangen gefressen werden, kann man das zum Beispiel so darstellen:

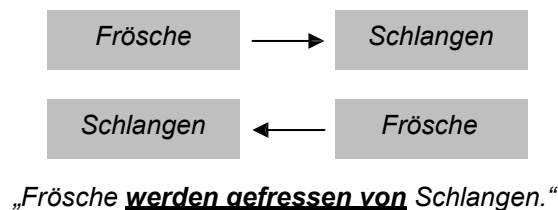

**Frage** In diesem Wald werden nun die Waldmäuse von einer tödlichen Krankheit befallen. Auf welche Tiere kann es sich auswirken, wenn sehr viele Waldmäuse an der Krankheit sterben? Markiere richtige Antworten mit **R** und falsche mit **F**.

- Antwort**
- A ☐ auf die Hermeline, Mauswiesel, jungen Füchse, Steinmarder, Luchse und Uhus
  - B ☐ nur auf die Hermeline, Mauswiesel, jungen Füchse und Steinmarder
  - C ☐ nur auf die Hermeline, Mauswiesel und Luchse
  - E ☐ nur auf die Hermeline, Mauswiesel, Luchse und die Steinmarder

## Aufgabe 11

Ein Wald, der seit vielen Jahrhunderten aus Buchen bestanden hatte, wurde durch die Bearbeitung von Förstern und Waldarbeitern im Laufe der letzten 150 Jahre zu einem reinen Fichtenwald umgewandelt, da man hieraus hervorragendes Bauholz gewinnen kann. An einigen wenigen Ecken ließen die Förster die Buchen auch weiterhin gewähren und sie vermehrten sich dort auch weiterhin prächtig. Die Förster des Waldes beschließen nun aus Kostengründen und da sie bemerkt hatten, dass die Fichten nur an wenigen Orten im Wald gut wachsen, in den nächsten Jahren in diesen neu entstandenen reinen Fichtenwald nicht mehr einzugreifen und ihn sich selbst zu überlassen.

**Frage** Wie verändert der Wald sich auf lange Sicht? Markiere richtige Antworten mit **R** und falsche mit **F**.

- Antwort**
- A** ☐ Der Fichtenwald bleibt nahezu gleich, da sich die Fichten nach und nach erneuern.
  - B** ☐ Aufgrund der schlechteren Wuchsbedingungen sterben die meisten Fichten nach und nach ab und werden langsam wieder durch selbst nachwachsende Buchen ersetzt.
  - C** ☐ Fichten und Buchen werden auf lange Sicht diesen Wald gemeinsam je zur Hälfte besiedeln.
  - D** ☐ An den meisten Orten im Wald wird auf lange Sicht die Buche vorkommen, an wenigen Orten aber auch weiterhin die Fichte.

## Aufgabe 12

In Wäldern werden Mäuse von Mardern gejagt. Das heißt, wenn es viele Marder gibt, werden viele Mäuse gefressen. Danach gibt es wenige Mäuse.

Wenn es wenige Mäuse gibt, können die Marder auch nur wenige Mäuse fressen. Einige Marder werden verhungern. Es wird anschließend weniger Marder geben. Wenn es wenige Marder gibt, können sich die Mäuse wieder vermehren.

Wenn es viele Mäuse gibt, können sich die Marder von ihnen ernähren und sich vermehren. Es wird dann wieder mehr Marder geben.

**Frage** Welche der Zeichnungen zeigt richtig, was der Text beschreibt? Markiere richtige Antworten mit **R** und falsche mit **F**.

**Beispiel:** Die Pfeile liest man so:

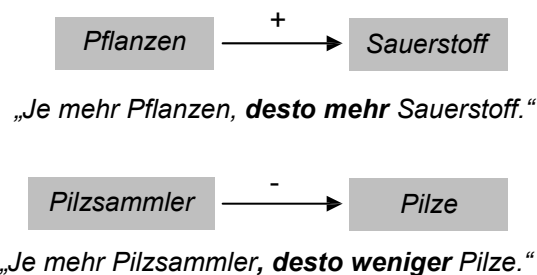

|                |          |                          |        |                                                                                                                                                                                                                                                                                                                                                                   |       |
|----------------|----------|--------------------------|--------|-------------------------------------------------------------------------------------------------------------------------------------------------------------------------------------------------------------------------------------------------------------------------------------------------------------------------------------------------------------------|-------|
| <b>Antwort</b> | <b>A</b> | <input type="checkbox"/> | Marder | <div style="display: flex; align-items: center;"> <div style="margin-right: 5px;">→</div> <div style="text-align: center;">+</div> <div style="margin-left: 5px;">→</div> </div> <div style="display: flex; align-items: center;"> <div style="margin-right: 5px;">←</div> <div style="text-align: center;">-</div> <div style="margin-left: 5px;">←</div> </div> | Mäuse |
|                | <b>B</b> | <input type="checkbox"/> | Marder | <div style="display: flex; align-items: center;"> <div style="margin-right: 5px;">→</div> <div style="text-align: center;">-</div> <div style="margin-left: 5px;">→</div> </div> <div style="display: flex; align-items: center;"> <div style="margin-right: 5px;">←</div> <div style="text-align: center;">+</div> <div style="margin-left: 5px;">←</div> </div> | Mäuse |
|                | <b>C</b> | <input type="checkbox"/> | Marder | <div style="display: flex; align-items: center;"> <div style="margin-right: 5px;">→</div> <div style="text-align: center;">-</div> <div style="margin-left: 5px;">→</div> </div> <div style="display: flex; align-items: center;"> <div style="margin-right: 5px;">←</div> <div style="text-align: center;">-</div> <div style="margin-left: 5px;">←</div> </div> | Mäuse |

### Aufgabe 13

Wenn man verschiedene Lebensräume im Wald betrachtet, kann man feststellen, dass diese unterschiedlich komplex sind. Komplex bedeutet, dass man viele Informationen benötigt, um etwas zu verstehen. Je komplexer ein Lebensraum ist, desto mehr Informationen benötigt man, um ihn zu verstehen und die dort ablaufenden Prozesse erklären zu können.

**Frage** Über welchen Lebensraum benötigt man die meisten Informationen, um ihn umfassend verstehen zu können? Markiere die richtige Antwort mit **R** und unpassende mit **F**.

- Antwort**
- A** ☐ eine abgestorbene Fichte
- B** ☐ das Nest eines Bussards
- C** ☐ ein Spinnennetz
- D** ☐ Eine Baumhöhle

### Aufgabe 14

Folgender Wirkungsgraph zeigt vereinfacht die Zusammenhänge in einem fiktiven System zwischen Temperatur, Eisfläche, Rückstrahlung und Absorption auf. Durch eine Störung in diesem kleinen System wird die Temperatur erhöht.

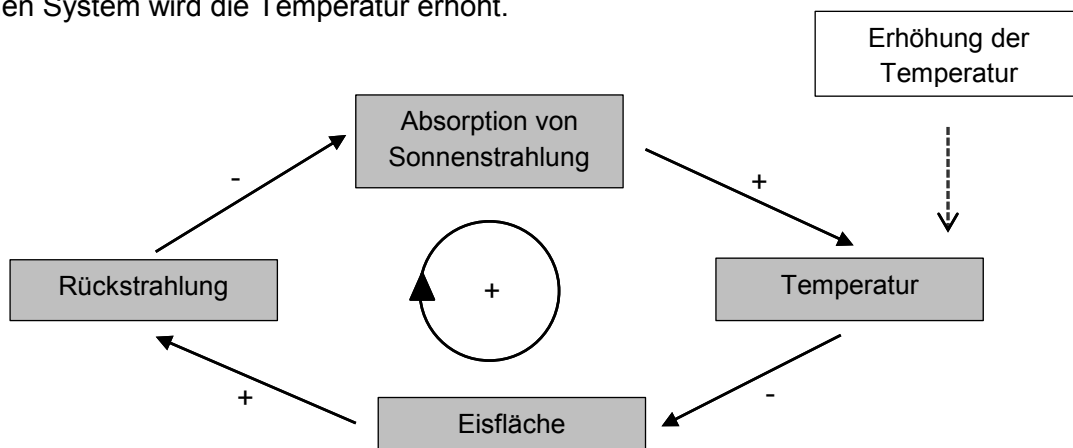



**Frage** Welche Auswirkungen hat dies? Markiere richtige Antworten mit **R** und falsche mit **F**.

**Antwort A** ☐ Die Absorption von Sonnenstrahlung nimmt ab.

**B** ☐ Die anfängliche Erhöhung der Temperatur geht mit Zeit wieder zurück.

**C** ☐ Die Rückstrahlung nimmt ab.

**D** ☐ In diesem System liegt eine positive Rückkopplung vor.

## Aufgabe 15

In einem Waldstück jagen Uhus vorwiegend Wildkaninchen. Das heißt, wenn es viele Uhus gibt, werden viele Wildkaninchen gefressen. Danach gibt es weniger Wildkaninchen. Wenn es wenige Wildkaninchen gibt, können die Uhus auch weniger Wildkaninchen fressen. Einige Uhus werden verhungern und es wird weniger Uhus geben. Wenn es wenige Uhus gibt, können sich die Wildkaninchen wieder vermehren. Wenn es viele Wildkaninchen gibt, können sich die Uhus von ihnen ernähren. Es wird dann wieder mehr Uhus geben.

**Beispiel:**

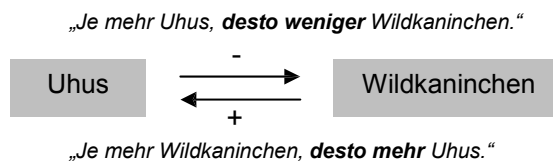

**Frage** In dieses Waldstück kommen jetzt Iltisse dazu. Iltisse ernähren sich auch überwiegend von Wildkaninchen. Iltisse und Uhus fressen sich nicht gegenseitig. Welche der Zeichnungen stellt nun alle gegebenen Informationen und ihre Folgen richtig dar? Markiere richtige Antworten mit **R** und falsche mit **F**.

**Antwort**

☐ **A**

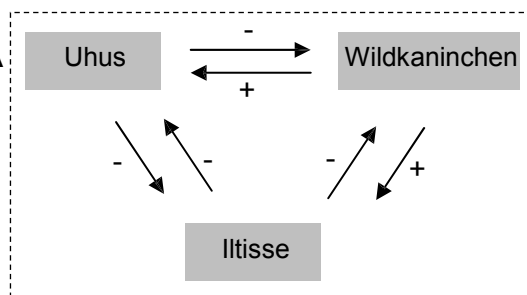

☐ **B**

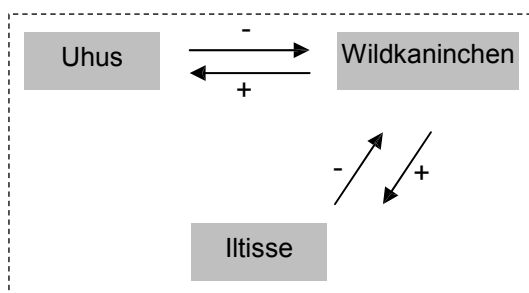

☐ **C**

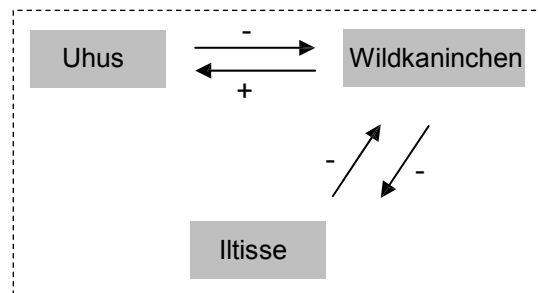

## Aufgabe 16

Ein Förster hat in einem Waldstück viele junge Bäume angepflanzt. Es dauert einige Jahre, bis diese Bäume stark genug sind, dass sie nicht mehr von Rehen geschädigt werden können.

Der Förster weiß, dass in dem Waldstück folgende Beziehungen gelten:

**Beispiel:** Die Pfeile liest man so:

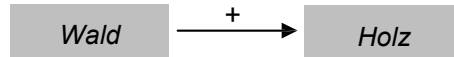

„Je **mehr** Wald, desto **mehr** Holz.“  
 „Je **weniger** Wald, desto **weniger** Holz.“

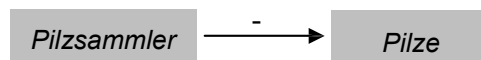

„Je **mehr** Pilzsammler, desto **weniger** Pilze.“  
 „Je **weniger** Pilzsammler, desto **mehr** Pilze.“

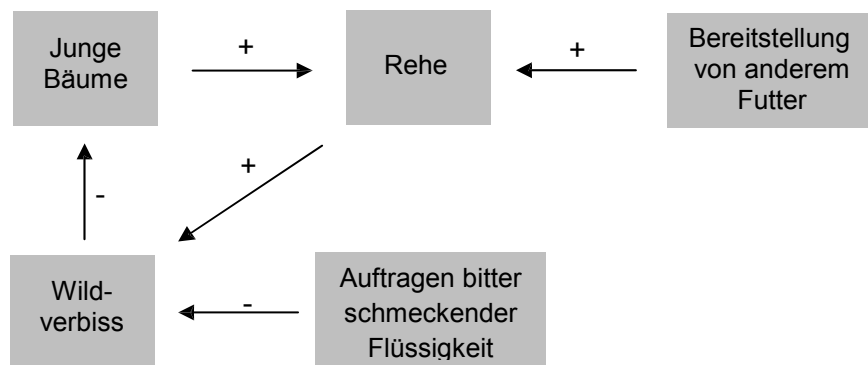

**Frage** Was sollte der Förster tun, damit die jungen Bäume in den nächsten Jahren nicht von Rehen geschädigt werden? Markiere richtige Antworten mit **R** und falsche mit **F**.

- Antwort**
- A ☐ Er sollte den Rehen das ganze Jahr über anderes Futter bereitstellen.
  - B ☐ Er sollte bitter schmeckende Flüssigkeit auf die jungen Bäume auftragen.
  - C ☐ Er sollte zusätzlich noch mehr junge Bäume anpflanzen.
  - D ☐ Er sollte die Anzahl der Rehe durch Jagd verringern.

## Aufgabe 17

Naturschützer möchten gerne, dass sich die seltenen Auerhühner im Wald nahe dem Naturschutzzentrum besser vermehren können.

Sie wissen, dass in dem Wald die folgenden Beziehungen gelten:

**Beispiel:** Die Pfeile liest man so:

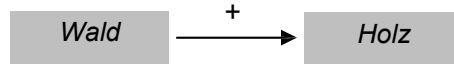

„Je **mehr** Wald, desto **mehr** Holz.“  
 „Je **weniger** Wald, desto **weniger** Holz.“

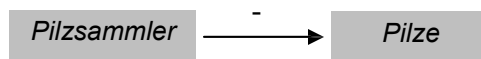

„Je **mehr** Pilzsammler, desto **weniger** Pilze.“  
 „Je **weniger** Pilzsammler, desto **mehr** Pilze.“

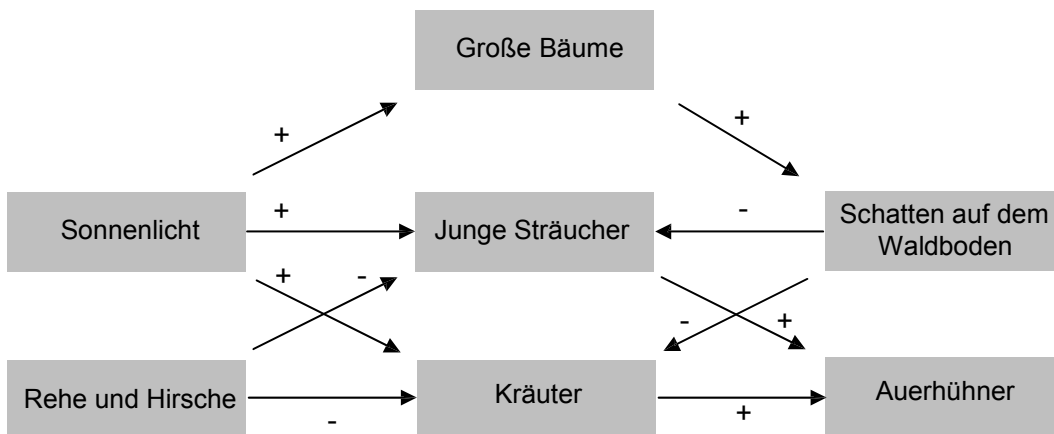

**Frage** Betrachte die Zeichnung. Was sollten die Naturschützer tun, damit sich die seltenen Auerhühner besser vermehren können? Markiere richtige Antworten mit **R** und falsche mit **F**.

- Antwort**
- A** ☐ Dafür sorgen, dass ausgewählte große Bäume gefällt werden.
  - B** ☐ Dafür sorgen, dass große Bäume möglichst viel Schatten spenden.
  - C** ☐ Dafür sorgen, dass das Sonnenlicht ungehindert auf den Waldboden scheint.

## Aufgabe 18

In Wäldern gelten diese Zusammenhänge:

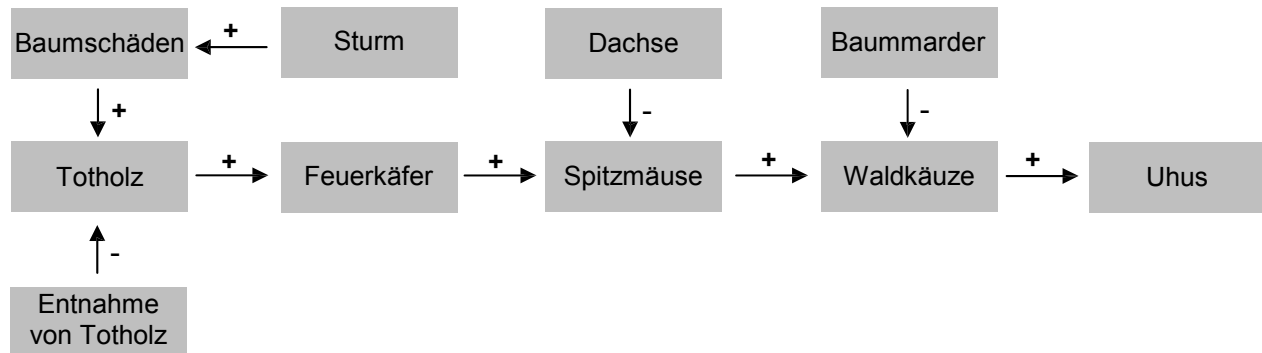

In einem Bannwald greift der Mensch gar nicht ein, zum Beispiel entnimmt er kein Holz.  
In einem Wirtschaftswald greift der Mensch regelmäßig ein und bearbeitet ihn.

**Beispiel:** Die Pfeile liest man so:

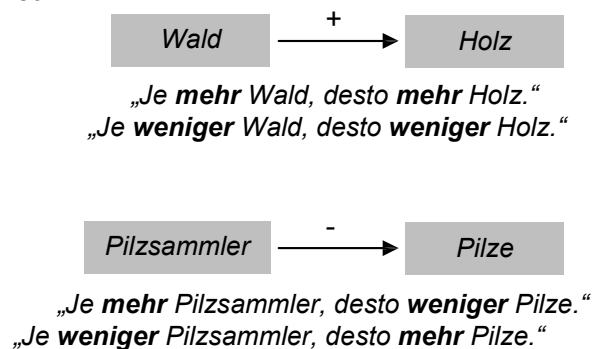

**Frage** Betrachte die Zeichnung.  
Woran kann es liegen, dass es in einem bestimmten Bannwald mehr Uhus gibt als in einem gleich großen Wirtschaftswald?  
Markiere richtige Antworten mit **R** und falsche mit **F**.

- Antwort**
- A** ☐ Es liegt daran, dass sich im Bannwald vor langer Zeit ein Sturm ereignete.
  - B** ☐ Es liegt daran, dass die Baummarder im Bannwald mehr Nahrung finden.
  - C** ☐ Es liegt daran, dass im Bannwald keine Entnahme von Totholz stattfindet.
  - D** ☐ Es liegt daran, dass sich Feuerkäfer im Bannwald besser ernähren können.

## Aufgabe 19

Im Wald werden Mäuse von Füchsen gefressen. Wenn es viele Füchse gibt, werden viele Mäuse gefressen. Danach gibt es weniger Mäuse.

Wenn es wenige Mäuse gibt, können die Füchse nur wenige Mäuse fressen. Einige Füchse werden verhungern. Es wird anschließend weniger Füchse geben.

Wenn es wenige Füchse gibt, können sich die Mäuse wieder vermehren.

Wenn es viele Mäuse gibt, können sich die Füchse von ihnen ernähren. Es wird dann wieder mehr Füchse geben.

**Beispiel:** Die Pfeile liest man so:

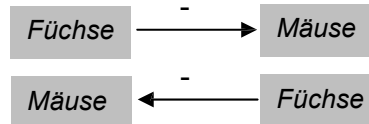

„Je mehr Füchse, **desto weniger** Mäuse.“

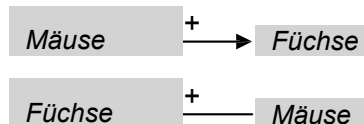

„Je mehr Mäuse, **desto mehr** Füchse.“

Man kann es zusammenfassend so darstellen:

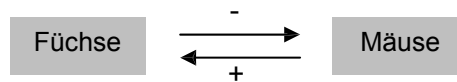

In diesen Wald kommen jetzt Eulen dazu.

Eulen ernähren sich auch von Mäusen und stehen daher mit den Füchsen in Konkurrenz. Eulen und Füchse fressen sich nicht gegenseitig.

**Aufgabe** Trage in die leeren Kästchen die **fehlenden Vorzeichen ( + oder - )** ein, so dass die Zeichnung alle gegebenen Informationen richtig darstellt.

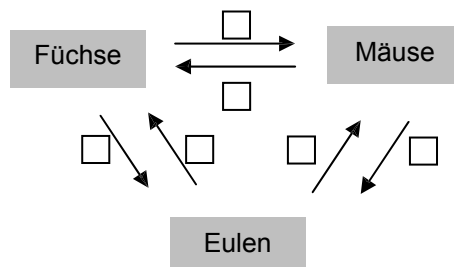

## Aufgabe 20

Je mehr tote Bäume (Totholz) es gibt, desto mehr Spechthöhlen können von Spechten gebaut werden. Unbewohnte Spechthöhlen werden auch von Gartenschläfern als Lebensraum genutzt. Das bedeutet, je mehr Spechthöhlen es gibt, desto mehr Gartenschläfer kann es geben. Gartenschläfer werden von Iltissen gejagt. Je mehr Iltisse es gibt, desto weniger Gartenschläfer kann es geben.

Das zeigt diese Zeichnung:

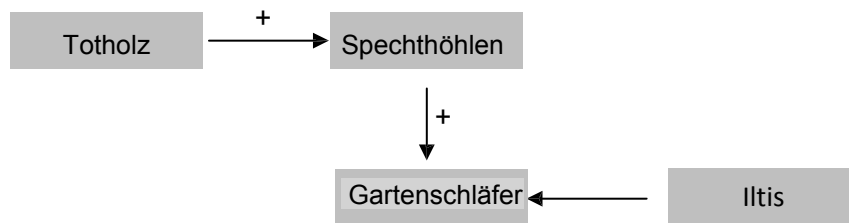

### Nun kommen diese Informationen hinzu:

Asseln des Waldes werden von Gartenschläfern gefressen. Je mehr Gartenschläfer es gibt, desto weniger Asseln kann es geben. Totholz ist auch Lebensraum für Asseln. Das bedeutet, je mehr Totholz es gibt, desto mehr Asseln kann es geben.

**Aufgabe** Ergänze die Zeichnung oben mit **Kästchen, Pfeilen und Beschriftung**, so dass alle hinzugekommenen Informationen des Textes dargestellt sind.

## Aufgabe 21

Der Schwarzwald ist ein beliebtes Ziel für Touristen. Wildbiologen haben festgestellt, dass im Schwarzwald nur sehr wenige Wildkatzen leben. Wildkatzen sind scheue Tiere und müssen ungestört sein, um sich fortpflanzen zu können. Viele Menschen wissen gar nicht, dass es im Schwarzwald Wildkatzen gibt. Jäger haben häufig Wildkatzen erlegt, weil sie meinten, es wären verwilderte Hauskatzen. Außerdem wurden Wildkatzen von freilaufenden Hunden gejagt. Man hat auch überfahrene Wildkatzen an Straßenrändern gefunden.

**Frage** Was könnte unternommen werden, damit es im Schwarzwald wieder mehr Wildkatzen geben kann?  
Nenne möglichst **mindestens 6 Möglichkeiten**:

## Aufgabe 22

In einem Wald werden Pilze von Schnecken gefressen. Schnecken werden von Dachsen, Falken und Maulwürfen gefressen. Maulwürfe werden von Dachsen und Falken gejagt. Spinnen werden von Maulwürfen gefressen.

**Beispiel:** Den Pfeil liest man so:

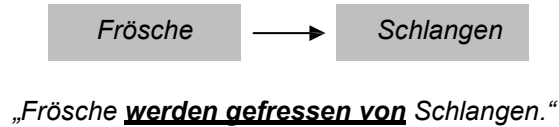

**Aufgabe** Die Kette soll zeigen, wer von wem gefressen wird.  
**Bilde vier sinnvolle Ketten von jeweils 3 Tieren.**

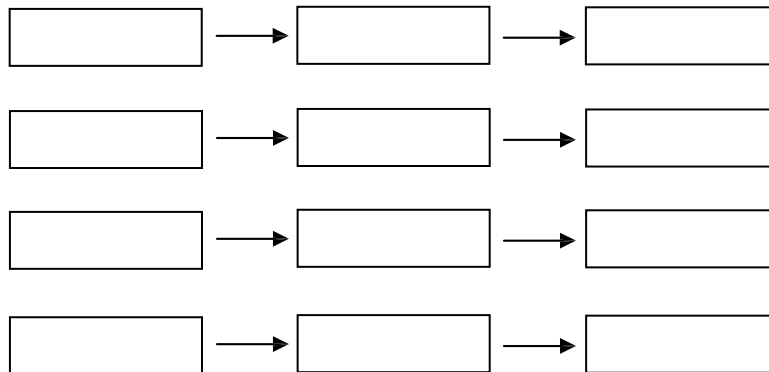

## Aufgabe 23

Ein Sturm führt dazu, dass Äste und Wurzeln der Bäume abreißen. Dadurch werden die Bäume geschwächt. Lange Trockenzeiten führen auch dazu, dass Bäume geschwächt werden. Außerdem führt eine lange Trockenzeit dazu, dass sich Borkenkäfer vermehren können. Sind die Bäume geschwächt, so können Borkenkäfer in die Rinde eindringen. Sind die Borkenkäfer in die Rinde eingedrungen, können sie sich dort vermehren. Das Eindringen der Borkenkäfer in die Rinde hat zur Folge, dass der Baum stirbt.

**Aufgabe:** Trage die fehlenden Pfeile ein, so dass die Zeichnung die Informationen aus dem Text vollständig darstellt.  
**Ein Pfeil bedeutet hier immer „führt zu“.**

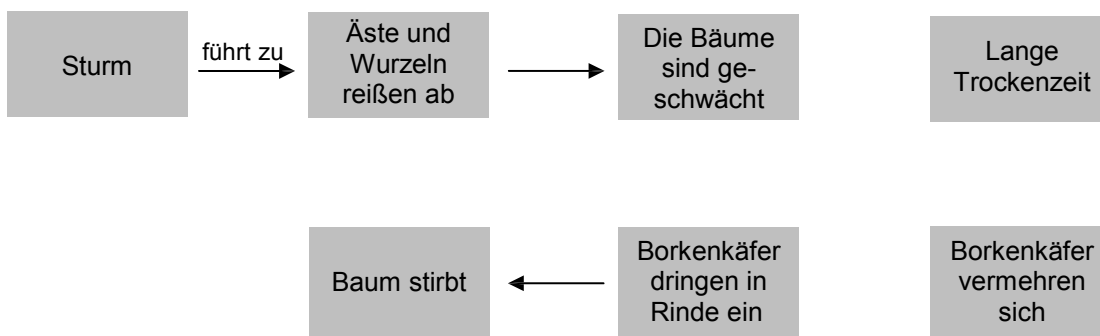

## Aufgabe 24

Die Zeichnung zeigt, was man über Spechte, ihre Nahrung und ihren Lebensraum weiß:

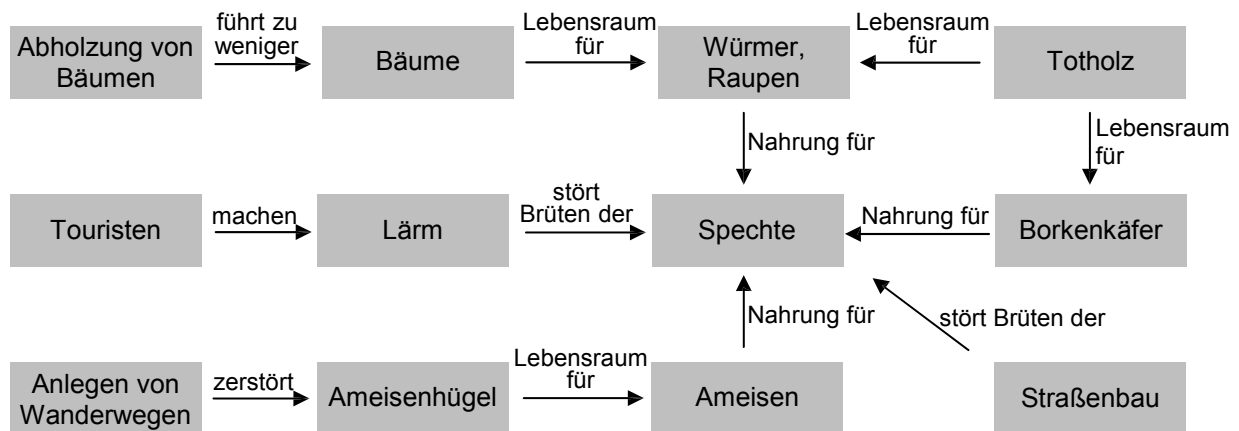

In einem stadtnahen Wald haben Forscher festgestellt, dass dort in den letzten Jahren Spechte immer seltener wurden. Sie fragen sich, woran das liegen kann.

**Frage** Was könnte am Wald verändert worden sein, so dass es jetzt nur noch wenige Spechte gibt?  
Betrachte die Zeichnung und nenne **mindestens 6 mögliche Gründe**:

## C Angabe von Geschlecht und Sprache

Mein Geschlecht: ☐ weiblich ☐ männlich

Die Sprache meiner Mutter: ☐ deutsch ☐ andere

Die Sprache meines Vaters: ☐ deutsch ☐ andere



## D Was ist mir wichtig in NWA

Bei diesen Fragen geht es um Dinge, die dir in der Schule im Fach NWA wichtig sind. Hier gibt es keine „richtigen“ oder „falschen“ Antworten.

Bitte lies die Fragen sorgfältig und sage ehrlich deine Meinung!

Für jede Aussage sollst du ein Kreuzchen setzen.

Bitte achte darauf, dass du wirklich alle Fragen beantwortest!

### Beispiel:

| <b>Kreuze an, ob die Aussage für dich stimmt!</b> | <b>stimmt<br/>gar<br/>nicht</b> | <b>stimmt<br/>eher<br/>nicht</b> | <b>weder/<br/>noch</b>   | <b>stimmt<br/>eher</b>              | <b>stimmt<br/>genau</b>  |
|---------------------------------------------------|---------------------------------|----------------------------------|--------------------------|-------------------------------------|--------------------------|
| <b><i>Ich spiele gerne Fußball</i></b>            | <input type="checkbox"/>        | <input type="checkbox"/>         | <input type="checkbox"/> | <input checked="" type="checkbox"/> | <input type="checkbox"/> |

Und jetzt du:

| <b>Im Fach NWA geht es mir darum ...</b>                       | <b>stimmt<br/>gar<br/>nicht</b> | <b>stimmt<br/>eher<br/>nicht</b> | <b>weder/<br/>noch</b>   | <b>stimmt<br/>eher</b>   | <b>stimmt<br/>genau</b>  |
|----------------------------------------------------------------|---------------------------------|----------------------------------|--------------------------|--------------------------|--------------------------|
| 1. ... die Unterrichtsinhalte wirklich zu verstehen.           | <input type="checkbox"/>        | <input type="checkbox"/>         | <input type="checkbox"/> | <input type="checkbox"/> | <input type="checkbox"/> |
| 2. ... nicht so schwer zu arbeiten.                            | <input type="checkbox"/>        | <input type="checkbox"/>         | <input type="checkbox"/> | <input type="checkbox"/> | <input type="checkbox"/> |
| 3. ... komplizierte Inhalte zu verstehen.                      | <input type="checkbox"/>        | <input type="checkbox"/>         | <input type="checkbox"/> | <input type="checkbox"/> | <input type="checkbox"/> |
| 4. ... keine schwierigen Fragen oder Aufgaben lösen zu müssen. | <input type="checkbox"/>        | <input type="checkbox"/>         | <input type="checkbox"/> | <input type="checkbox"/> | <input type="checkbox"/> |
| 5. ... dass das Gelernte für mich Sinn ergibt.                 | <input type="checkbox"/>        | <input type="checkbox"/>         | <input type="checkbox"/> | <input type="checkbox"/> | <input type="checkbox"/> |
| 6. ... mit wenig Arbeit durch NWA zu kommen.                   | <input type="checkbox"/>        | <input type="checkbox"/>         | <input type="checkbox"/> | <input type="checkbox"/> | <input type="checkbox"/> |
| 7. ... dass die Arbeit leicht ist.                             | <input type="checkbox"/>        | <input type="checkbox"/>         | <input type="checkbox"/> | <input type="checkbox"/> | <input type="checkbox"/> |
| 8. ... etwas Interessantes zu lernen.                          | <input type="checkbox"/>        | <input type="checkbox"/>         | <input type="checkbox"/> | <input type="checkbox"/> | <input type="checkbox"/> |

## E Was denkst du...

Jetzt geht es darum, was du über dich selbst denkst.

Bitte lies jeden Satz genau durch und kreuze ehrlich an, wie sehr der Satz auf dich zutrifft.

### Beispiel:

**Ich bin ...**

überhaupt nicht neugierig    ☐   ☐   ☐   ☐   ☐   sehr neugierig

„Ich bin überhaupt nicht neugierig“    „Ich bin eher nicht neugierig“    „Ich bin weder nicht neugierig noch neugierig“    „Ich bin ein bisschen neugierig“    „Ich bin sehr neugierig“

Und jetzt du:

1. Ich kann im Fach NWA...

...weniger als  
meine MitschülerInnen.

☐   ☐   ☐   ☐   ☐   ☐

...mehr als meine  
MitschülerInnen.

2. Mit den Aufgaben im Fach NWA komme ich ...

... schlechter zu-  
recht als meine  
MitschülerInnen.

☐   ☐   ☐   ☐   ☐   ☐

... besser zurecht als  
meine MitschülerInnen.

3. Etwas Neues in NWA zu lernen fällt mir ...

... schwerer als  
meinen MitschülerInnen.

☐   ☐   ☐   ☐   ☐   ☐

...leichter als meinen  
MitschülerInnen.

## F Angabe der Zeugnisnoten

Meine letzte Zeugnisnote in Deutsch: \_\_\_\_\_(bitte eintragen)

Meine letzte Zeugnisnote in Mathe: \_\_\_\_\_(bitte eintragen)

Meine letzte Zeugnisnote in NWA: \_\_\_\_\_(bitte eintragen)

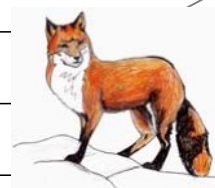

**Super, jetzt hast du es geschafft!**  
**Vielen Dank, dass du mitgemacht hast!**
